1 **Similar geographic patterns but distinct assembly processes of abundant and rare**  
2 **bacterioplankton communities in river networks of the Taihu Basin**

3

4 Sai Xu\*

5 School of Environmental and Biological Engineering, Nanjing University of Science  
6 and Technology, Nanjing 210094, China

7

8 \* Corresponding author. Email address: [xusai@njjust.edu.cn](mailto:xusai@njjust.edu.cn)

9

10 **Abstract**

11 Bacterioplankton play an important role in the biochemical cycling in rivers. The  
12 dynamics of hydrologic conditions in rivers were believed to affect geographic pattern  
13 and assembly process of these microorganisms, which have not been widely  
14 investigated. In this study, the geographic pattern and community assembly process of  
15 bacterioplankton in river networks of the Taihu Basin were systematically explored  
16 using amplicon sequencing of the 16S rRNA gene. The results showed that community  
17 structure, diversity, and taxonomic composition of bacterioplankton all exhibited  
18 significant temporal variation during wet, normal, and dry seasons ( $p < 0.01$ ). The  
19 neutral community model and null model were applied to reveal the assembly process  
20 of bacterioplankton community. The stochastic process and deterministic process both  
21 shaped the bacterioplankton community with greater influence of deterministic process.  
22 In addition, the abundant and rare bacterioplankton communities were comparatively  
23 analyzed. The abundant and rare bacterioplankton communities exhibited similar  
24 temporal dynamics (principal coordinates analysis) and spatial variations (distance-  
25 decay relationship), indicating similar geographic patterns. Meanwhile, distinct  
26 assembly processes were observed for the abundant and rare bacterioplankton  
27 communities. Stochastic process (dispersal limitation) shaped the abundant  
28 bacterioplankton community while deterministic process (heterogeneous selection)  
29 dominated the assembly process of rare bacterioplankton community. Mantel test,  
30 redundancy analysis, and correlation analysis together indicated that pH and dissolved  
31 oxygen were the major environmental attributes that affected the bacterioplankton  
32 community structure and assembly process. These results expanded our understanding  
33 of the geographic patterns, assembly processes, and driving factors of the  
34 bacterioplankton community in river networks and provided clues provided clues for  
35 the underlying mechanisms.

36

37 **Keyword:** River networks; Bacterioplankton; Geographic pattern; Community  
38 assembly

39

## 40 **1. Introduction**

41 Aquatic environments are one of the most diverse ecosystems on the earth  
42 (Dudgeon et al., 2006) and play crucial roles in ecological services (Baron et al., 2002).  
43 Lotic ecosystems (e.g., rivers) and lentic ecosystem (e.g., lakes) are fundamental  
44 components of aquatic environments, and they are essential for biochemical cycling.  
45 Certain human development activities, such as agriculture, industry, and urbanization,  
46 can pose more effects on environmental variables of lotic ecosystems, leading to their  
47 environmental conditions that are more complex and dynamic compared to lentic  
48 ecosystem (Chen et al., 2019). Therefore, revealing the dynamics of lotic ecosystems  
49 could contribute to our understanding of the ecological process in aquatic environments.

50 Bacterioplankton are a major driver of biochemical cycles in rivers, including  
51 nutrients cycling and pollutants degradation (Madsen, 2011). Rivers in the subtropical  
52 region of China experience remarkable wet-normal-dry cycles annually, resulting in  
53 dynamic hydrologic and environmental conditions. The periodic variations of  
54 environmental conditions were found to affect the riverine microbial communities  
55 (microeukatyotic communities) in a pronounced manner during wet and dry seasons  
56 (Chen et al., 2019). Therefore, it is reasonable to expect that the bacterioplankton  
57 community could vary across different hydrologic periods.

58 The assembly process of bacterial community that shape the bacterial diversity is  
59 a central topic in aquatic environments with great ecological importance. Niche theory  
60 and neutral theory are two critical and complementary mechanisms for discerning  
61 assembly process of bacterial community. The niche theory believes that bacterial  
62 communities are largely controlled by deterministic factors, including abiotic factors  
63 (e.g., pH, temperature, and oxygen) and biotic factors (such as competition, mutualism  
64 and predation) (Lima-Mendez et al., 2015; Vanwonterghem et al., 2014). In contrast,  
65 the neutral theory assumes that stochastic processes (such as birth, death, speciation,  
66 limited dispersal, and immigration) dominantly shape bacterial diversity (Chave, 2004;  
67 Hubbell, 2005; Zhou and Ning, 2017). Currently, most of the studies focused on the  
68 assembly process of bacterial community in lentic ecosystems (Liu et al., 2015; Wan et  
69 al., 2021; Wu et al., 2018; Zhao et al., 2017) and far less is known about the assembly

70 process of bacterial community in lotic ecosystems. A previous study showed that  
71 deterministic process shaped the bacterioplankton communities during dry season in a  
72 human-impacted river (Isabwe et al., 2018). However, in the subtropical region of  
73 China, rivers are interconnected with each other and it is difficult to make broad  
74 generalizations based on the observation of a single river. River networks consist of  
75 several rivers with close geographic location and connectivity, making them an ideal  
76 target for investigating the assembly process of bacterial community in lotic ecosystems.

77 In both natural and artificial ecosystems, bacteria typically present a skewed  
78 abundance distribution. A relatively limited number of high abundance bacteria  
79 (abundant taxa) co-occurred with a large number of low abundance bacteria (rare taxa)  
80 (Jia et al., 2018). The abundant taxa generally contributed major functions in  
81 ecosystems due to their high abundance (Kim et al., 2013). Recent studies found some  
82 rare taxa were metabolically active in environments (Lynch and Neufeld, 2015) and  
83 they were taken as the major drivers for ecosystem multifunctionality (Chen et al.,  
84 2020). Therefore, the rare taxa may also be of great importance to ecological functions  
85 in ecosystems. Previous studies revealed that the rare taxa and abundant taxa exhibited  
86 similar geographic patterns in coastal Antarctic lakes (Logares et al., 2013). In contrast,  
87 different patterns of abundant and rare taxa were observed in an artificial bioreactor  
88 (Kim et al., 2013). These results indicated the abundant and rare taxa may have distinct  
89 patterns in different ecosystems. However, in lotic ecosystems, our knowledge of  
90 bacterial community was mainly focused on whole taxa (Lu et al., 2021; Staley et al.,  
91 2013), with the respective roles of abundant and rare taxa remaining unclarified.

92 In this study, the bacterioplankton community in river networks of the Taihu Basin  
93 during wet, normal and dry seasons was analyzed using the amplicon sequencing  
94 approach. The diversity, geographic pattern, and assembly process of the  
95 bacterioplankton community were investigated to separately address: (1) Does the  
96 bacterioplankton community exhibit spatiotemporal dynamics across different seasons?  
97 (2) Does the abundant and rare bacterioplankton exhibit similar geographic patterns  
98 under different hydrologic conditions? (3) Are the abundant and rare bacterioplankton  
99 communities assembled via similar processes?

## 100 **2. Materials and Methods**

### 101 2.1 Sample collection and environmental attributes analysis

102 The Taihu Basin, located in subtropical region of China, covers an area of 36,900  
103 km<sup>2</sup>. This region is one of the world's famous water-towns and there are at least 15  
104 rivers in this region with a total length of 120,000 km. These rivers are interconnected  
105 with each other, forming dense river networks of 3.2 km/km<sup>2</sup>. Water samples were  
106 collected from four crisscrossing rivers (18 sampling sites) in the Taihu Basin during  
107 wet (July 2020), normal (October 2020) and dry (January 2021) seasons (Figure S1).  
108 We failed to obtain water samples from two sampling sites in July due to unforeseen  
109 reasons and a total of 52 samples were obtained in this study (Table S1). At each  
110 sampling site, 2 L surface water was immediately filtered through 0.22- $\mu$ m  
111 polycarbonate membrane and an additional 1 L water was transported to the laboratory  
112 on ice for environmental attributes analysis within one day.

113 The pH and dissolved oxygen (DO) were measured using a water quality analyzer  
114 (Hach, USA). Total nitrogen (TN), total phosphorus (TP), phosphate phosphorus (PO<sub>4</sub><sup>3-</sup>  
115 -P), ammonia nitrogen (NH<sub>4</sub><sup>+</sup>-N), nitrate nitrogen (NO<sub>3</sub><sup>-</sup>-N) and nitrite nitrogen (NO<sub>2</sub><sup>-</sup>-  
116 N) were determined colorimetrically by a spectrophotometer (Hach, USA). Water  
117 samples were digested by K<sub>2</sub>S<sub>2</sub>O<sub>8</sub> before the TN and TP analysis. For the total  
118 suspended solid (TSS) analysis, water samples were firstly filtered through a 0.45- $\mu$ m  
119 polycarbonate membrane and then weighed after drying at 105 °C for 6 h. The  
120 environmental attributes of each sample were listed in Table S2.

### 121 2.2 DNA extraction, PCR amplification and sequencing

122 Microbial DNA was extracted by the FastDNA® SPIN Kit for Soil (MP  
123 biomedical, USA). The concentration and purity of the extracted DNA were measured  
124 by the Qubit fluorometer (Thermo Scientific, USA) and Nanodrop 2000 (Thermo  
125 Scientific, USA), respectively.

126 The bacterioplankton communities were profiled by amplicon sequencing of the  
127 16S rRNA gene. The V4 region of bacterial 16S rRNA gene was amplified by the  
128 universal primer pair 515F/806R (Caporaso et al., 2011). The PCR products were  
129 initially checked by agarose electrophoresis (1%) and then purified by QIAquick PCR

130 Purification Kit (Qiagen, Germany). The purified PCR products were then pooled  
131 together in equal amount and sequenced on the Illumina's NovaSeq 6000 platform at  
132 the Novogene (Beijing, China). All of the raw sequencing data have been deposited in  
133 the Genome Sequence Archive in National Genomics Data Center  
134 (<https://ngdc.cncb.ac.cn/gsa>) under accession number CRA004387.

### 135 2.3 Sequencing data processing

136 The raw sequencing data were firstly quality checked by fastqc tool  
137 (<http://www.bioinformatics.babraham.ac.uk/projects/fastqc>) to ensure that the data  
138 were of good quality and suitable for the following analysis. Then sequencing data was  
139 processed using USEARCH software (version 11.0.667) (Edgar, 2010). The pair-end  
140 reads were merged together by overlapping reads, followed by removal of chimeras and  
141 trimming off low-quality reads. The merged reads were clustered into different  
142 operational taxonomy units (OTUs) at 97% similarity level using the UPARSE  
143 algorithm (Edgar, 2013). A representative sequence from each OTU was selected for  
144 taxonomic annotation against the Ribosomal Database Project (RDP) 16S rRNA gene  
145 training set (version 18) using the Bayesian classifier at 80% confidence level (Wang  
146 et al., 2007). Afterward, all chloroplast, archaeal, eukaryotic, and unknown sequences  
147 were discarded before further analysis. To reduce the potential of PCR bias, OTUs with  
148 less than 5 sequences were removed and the sequence number was finally rarefied to  
149 42,196 per sample for downstream analysis.

150 In this study, abundant and rare bacterioplankton communities were clarified and  
151 picked out following a previous method (Jiao and Lu, 2020a; Zhang et al., 2021). The  
152 abundant bacterioplankton community consisted of OTUs with relative abundance  
153 higher than 0.1% and the rare bacterioplankton community comprised of OTUs with  
154 relative abundance less than 0.01%. The representative OTUs (top 20 most abundant)  
155 from the abundant and rare bacterioplankton communities were selected for  
156 phylogenetic analysis by MEGA7 software using neighbor-joining method (1000  
157 bootstrap replicates) (Kumar et al., 2016) and further modified by “ggtree” package  
158 (version 2.0.4) in R software (version 3.6.2) (Yu et al., 2017).

### 159 2.4 Statistical analysis

160 All of the following analysis were performed in R software (version 3.6.2) unless  
161 otherwise indicated.

162 The  $\alpha$ -diversity index (Shannon diversity index) for each sample and  $\beta$ -diversity  
163 index (“Bray-Curtis” distance) for each pairwise sample were calculated using “vegan”  
164 package (version 2.5-6). One-way ANOVA followed by Duncan’s honestly significant  
165 difference test was used to compare the  $\alpha$ -diversity and  $\beta$ -diversity among different  
166 seasons by “agricolae” package (version 1.3-1). The linear discriminant analysis (LDA)  
167 followed by Kruskal-Wallis test was performed to identify the significant biomarker  
168 taxa using the online pipeline (<http://huttenhower.sph.harvard.edu/galaxy>) (Segata et  
169 al., 2011). The principal coordinates analysis (PCoA) based on “Bray-Curtis” distance  
170 was performed to show the profile of bacterioplankton community using “vegan”  
171 package (version 2.5-6). The geographic distance between each pairwise sampling site  
172 was calculated by “geosphere” package (version 1.5-10) using the longitude and  
173 latitude data, and the distance-decay relationship was calculated as the slope of an  
174 ordinary least squares regression between geographic distance and “Bray-Curtis”  
175 distance.

176 The neutral community model was used to determine the potential roles of  
177 stochastic processes in the assembly process of bacterial community by predicting the  
178 relationship between detection frequency and relative abundance of each OTU (Sloan  
179 et al., 2006). The fit of the neutral community model ( $R^2$ ) was calculated by “MicEco”  
180 package (version 1.2-1) and positive  $R^2$  indicated the fit of neutral community model.  
181 Then the null model analysis (999 randomizations) was performed to quantify the  
182 relative contributions of stochastic and deterministic processes for the assembly process  
183 of bacterial community (Stegen et al., 2013). The beta nearest taxon index ( $\beta$ NTI) and  
184 Raup-Crick metric (RC) were calculated by “picante” package (version 1.8.2). The  
185  $\beta$ NTI values less than -2 indicated homogeneous selection, whereas values higher than  
186 2 indicated heterogeneous selection (Zhou and Ning, 2017). For the  $\beta$ NTI values  
187 between -2 and 2, the RC values less than -0.95 represented homogenous dispersal,  
188 values higher than 0.95 represented dispersal limitation and the remaining parts  
189 represented undominated fraction (Zhou and Ning, 2017). To further reveal the

190 influence of dispersal limitation on assembly process of bacterial community, the  
191 habitat niche breadth (Levins index) was calculated using “spaa” package (version  
192 0.2.2). To illustrate the impacts of environmental attributes on the community structure,  
193 Mantel correlation analysis and redundancy analysis (RDA) was performed. The  
194 environmental preferences of representative OTUs from the abundant and rare  
195 bacterioplankton communities were analyzed based on the Spearman correlation  
196 coefficients by “Hmisc” package (version 4.3-0).

197 Network analysis based on Spearman’s rank correlations was applied to visualize  
198 the co-occurrence among OTUs. To simplify the networks for a better visualization,  
199 only the OTUs that occurred in 60% of the samples were retained for network analysis.  
200 The Spearman correlations were calculated by the “Hmisc” package (version 4.3-0) and  
201 the correlation was considered robust when the |correlation coefficient| ( $|r|$ ) was higher  
202 than 0.85 and  $p$  was less than 0.01. The  $p$  values were adjusted by the false discovery  
203 rate method (Benjamini and Hochberg, 1995) to reduce the chances of obtaining false  
204 positive results. The visualization and topological analysis of the network was  
205 performed on the Gephi software (version 0.9.2) (Bastian et al., 2009).

### 206 **3. Results**

#### 207 3.1 Dynamics of bacterioplankton community composition and diversity

208 In this study, a sampling companion was carried out on river networks of the Taihu  
209 Basin (18 sampling sites, 52 samples) during wet, normal, and dry seasons. After  
210 amplicon sequencing of the bacterial 16S rRNA gene, followed by the quality checking  
211 and sequences filtering, a total of 3,416,477 high-quality sequences were obtained,  
212 which could be clustered into 16,443 OTUs. Most of the OTUs (15,423 OTUs)  
213 belonged to bacteria domain and the low abundance OTUs (total sequence  $\leq 5$ ) were  
214 then removed to reduce the potential PCR bias. A total of 9,500 bacterial OTUs were  
215 finally obtained and the number of sequences per sample ranged from 42,196 to 76,114.  
216 To fairly compare all the samples at the same sequencing depth, the sequence number  
217 was finally rarefied to 42,196 for downstream analysis. For each sample, 1,386-4,742  
218 OTUs were obtained and the Shannon diversity ranged from 2.74 to 6.62. Comparison  
219 of the Shannon diversity index revealed that the diversity of the bacterioplankton



220 community exhibited temporal dynamics and it was more diverse in wet and normal  
221 seasons than dry season (Figure 1a).

222 The representative sequence from each OTU was blasted to different phylogenetic  
223 taxa against the RDP database. *Proteobacteria* exhibited the highest OTU richness  
224 (29.3% of OTUs) and it was the most abundant bacterial phylum for most of the  
225 samples (80.8%), accounting for 27.8% to 77.0% of the total bacterial sequences, with  
226 an overall abundance of 48.4%. *Actinobacteria*, *Cyanobacteria*, and *Bacteroidetes* were  
227 also predominant in the bacterioplankton community, with an abundance >10% of the  
228 total bacterial sequences (Figure 1b). Temporal variation of the taxonomic composition  
229 was also observed. The LDA followed by Kruskal-Wallis test revealed that  
230 *Planctomycetes*, *Omnitrophica*, and *Bacteroidetes* were the most significant biomarker  
231 taxa in wet, normal, and dry seasons, respectively ( $p<0.05$ ) (Figure 1c).

232 The abundant and rare bacterioplankton communities were comparatively  
233 analyzed. A total of 149 abundant OTUs (total abundance=70.1%) and 8,697 rare OTUs  
234 (total abundance=10.9%) were selected for abundant community and rare community,  
235 respectively. Similar to the whole bacterioplankton community, *Proteobacteria*  
236 exhibited the highest OTU richness (50.3% in abundant community and 28.2% in rare  
237 community) and it was the most abundant phylum in both abundant community and  
238 rare community, accounting for 52.2% and 33.5% of total sequences, respectively  
239 (Figure S2).

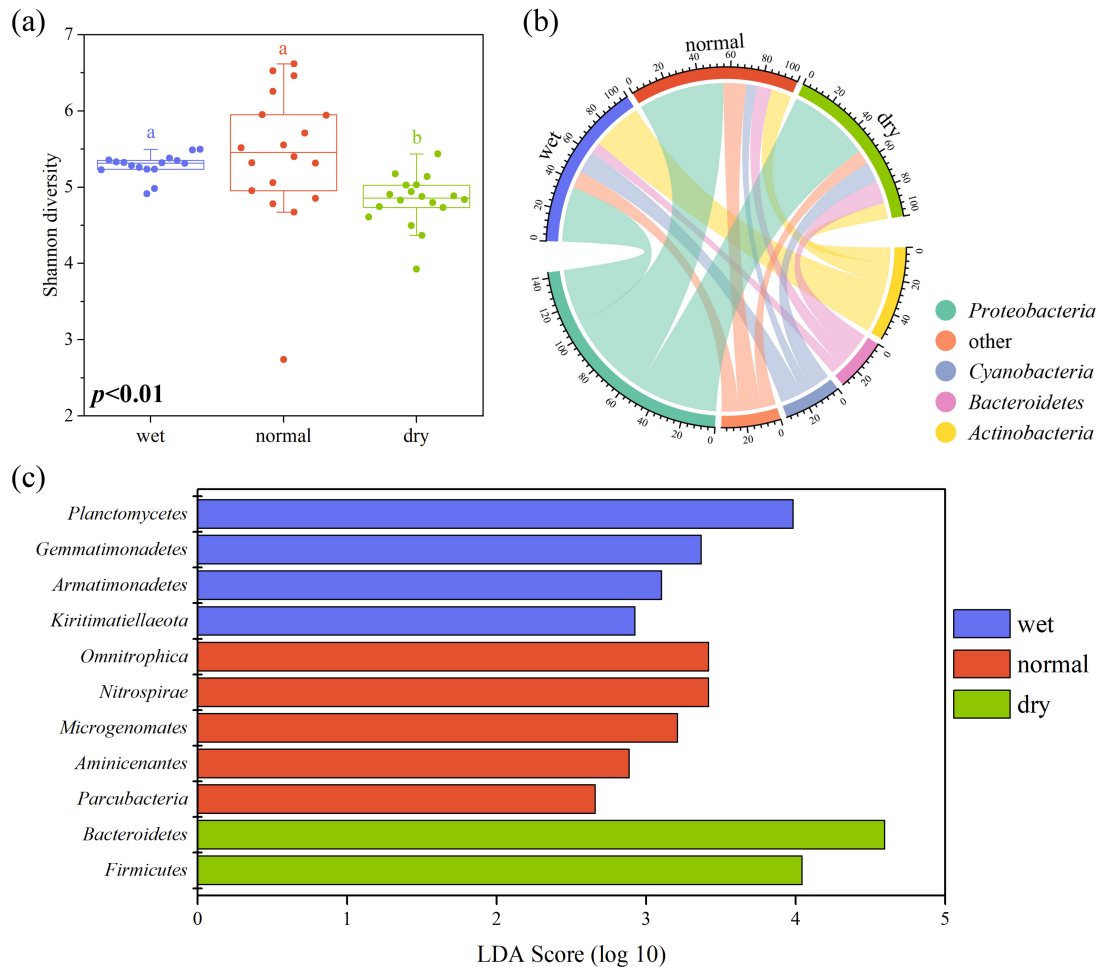

240

241 Figure 1 Diversity and composition of bacterioplankton community during wet, normal,  
242 and dry seasons. (a) Diversity of bacterioplankton community (Shannon diversity).  
243 Different letter indicated significant difference ( $p < 0.05$ , Duncan test). (b) Taxonomic  
244 composition of bacterioplankton community at the phylum level. “Other” referred to  
245 phyla with average abundance  $< 10\%$ . (c) Temporal variation of bacterioplankton  
246 community. Bacterial phyla with significant differences were identified by LDA  
247 ( $p < 0.05$ , Kruskal-Wallis test).

### 248 3.2 Dynamics of bacterioplankton community structure

249 The “Bray-Curtis” index was calculated to show the similarity distance for each  
250 pairwise sample. As shown in Figure S3, the “Bray-Curtis” index exhibited temporal  
251 dynamics. The samples in wet season showed the highest similarity while those in  
252 normal season were the lowest. In addition, the community similarity was found to  
253 decrease with increasing geographic distance during wet and normal seasons. These  
254 results revealed that the bacterioplankton community structure exhibited spatial

255 variation with a distance-decay pattern (Figure 2). For the abundant and rare  
256 bacterioplankton communities, distance-decay patterns, similar to the whole  
257 bacterioplankton community, were also observed, indicating the abundant and rare  
258 community structures also exhibited spatial variations. Moreover, the distance-decay  
259 pattern was found to be more significant during dry season (Figure 2b,  $p < 0.001$ ) than  
260 wet season (Figure 2a,  $p < 0.05$ ), which were consistent for the whole, abundant, and  
261 rare bacterioplankton communities.

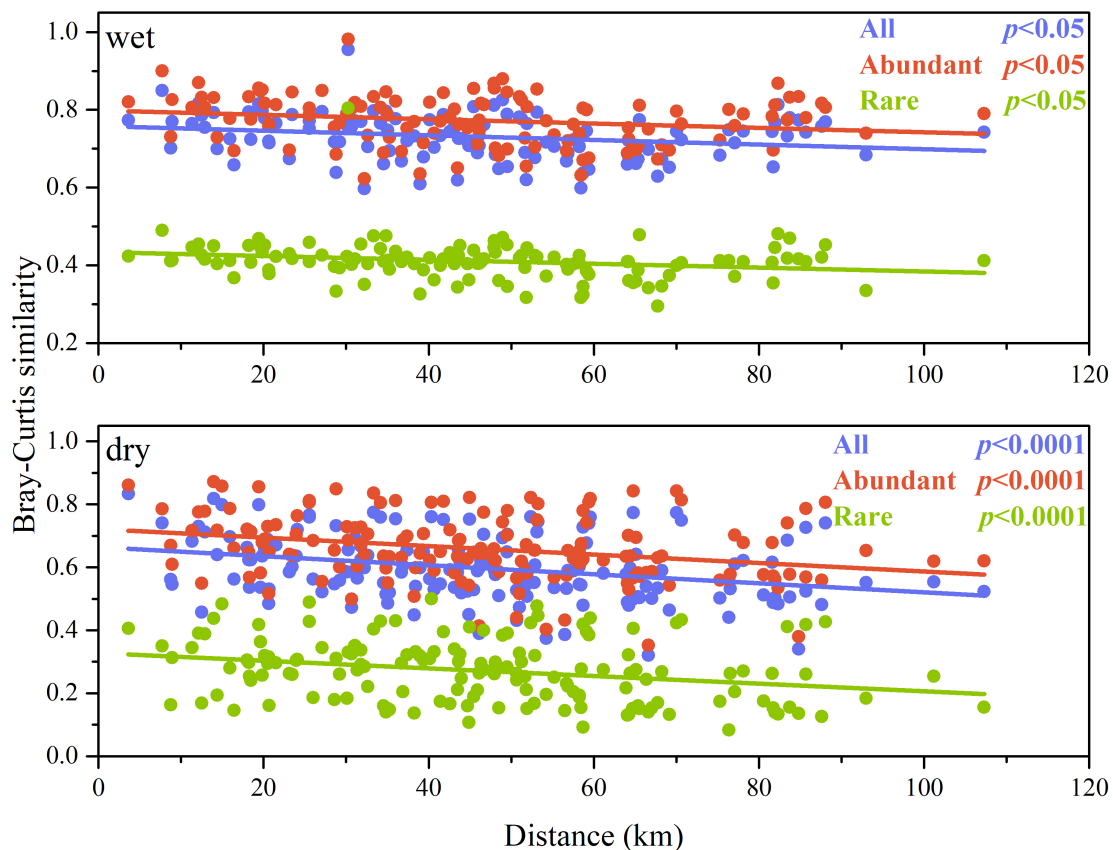

262  
263 Figure 2 Linear regression between geographic distance and community similarity  
264 (“Bray-Curtis” distance) during wet and dry seasons. Solid lines indicated the ordinary  
265 least-square linear regression.

266 PCoA plot based on the “Bray-Curtis” distance was shown in Figure 3a. Samples  
267 from the same season were grouped together and the different seasons were clearly  
268 separated. Meanwhile, similar profiles were observed for the abundant and rare  
269 bacterioplankton communities (Figure 3a), showing that the abundant and rare  
270 bacterioplankton communities exhibited similar temporal variations. Notably, the Venn  
271 diagram showed that almost all of the OTUs (96.6%) were shared for the abundant

272 bacterioplankton community and no OTUs were unique among three seasons (Figure  
273 3b). On the contrary, 30.6% of the OTUs for the rare bacterioplankton community were  
274 found to be unique among three seasons (Figure 3b). This observation indicated that  
275 the biodiversity pattern largely differed between abundant and rare bacterioplankton  
276 communities.

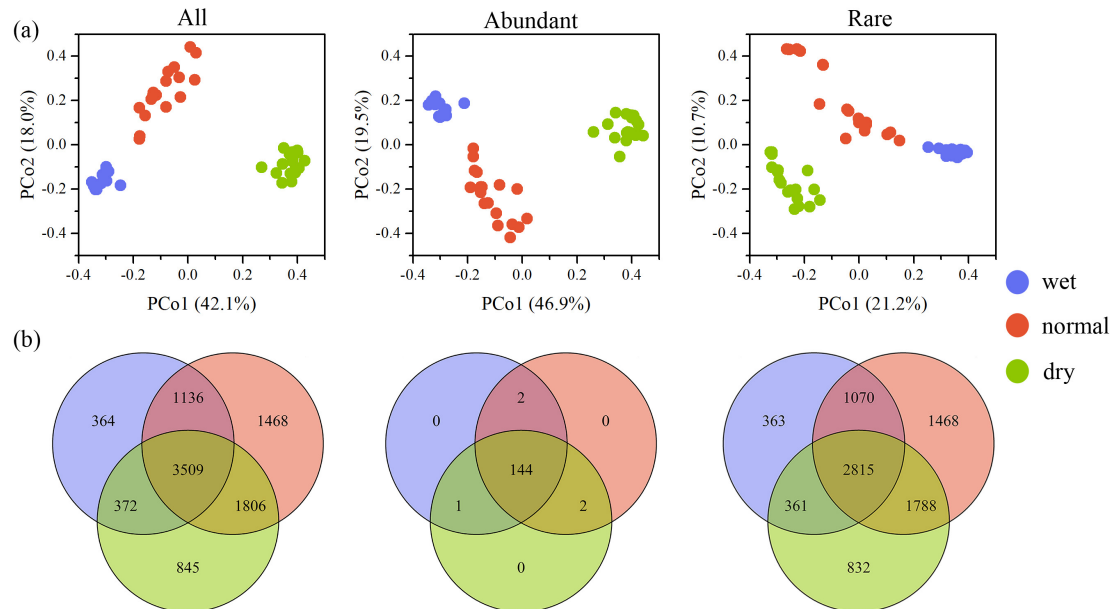

277  
278 Figure 3 Distribution patterns of bacterioplankton community during wet, normal and  
279 dry seasons. (a) PCoA plot showing the variation of bacterioplankton community (OTU  
280 levels) based on “Bray-Curtis” similarity distance. (b) Venn diagram showing the  
281 numbers of shared and unique OTUs.

### 282 3.3 Co-occurrence pattern of bacterioplankton community

283 Based on the Spearman’s correlation, the co-occurrence network of the  
284 bacterioplankton community was generated (Figure 4a). Most of the edges (90.7%) in  
285 this network were positive, indicating that positive co-occurrence relationships  
286 accounted for almost all of the bacterioplankton community. This network consisted of  
287 16 modules, with top 4 major modules accounting for 74.7% of the nodes. Among these  
288 4 major modules, 77.6% of the nodes were assigned as *Actinobacteria*, *Cyanobacteria*,  
289 *Bacteroidetes* and *Proteobacteria*, of which *Proteobacteria* exhibited the highest  
290 percentage (32.3%) except in Module II (Figure 4b). In addition, the co-occurrence  
291 networks for wet and dry seasons were also built (Figure 4c). The topological properties

292 indicated that the bacterioplankton community had a more complex network during dry  
293 season and it was less connected during wet season (Table S3).

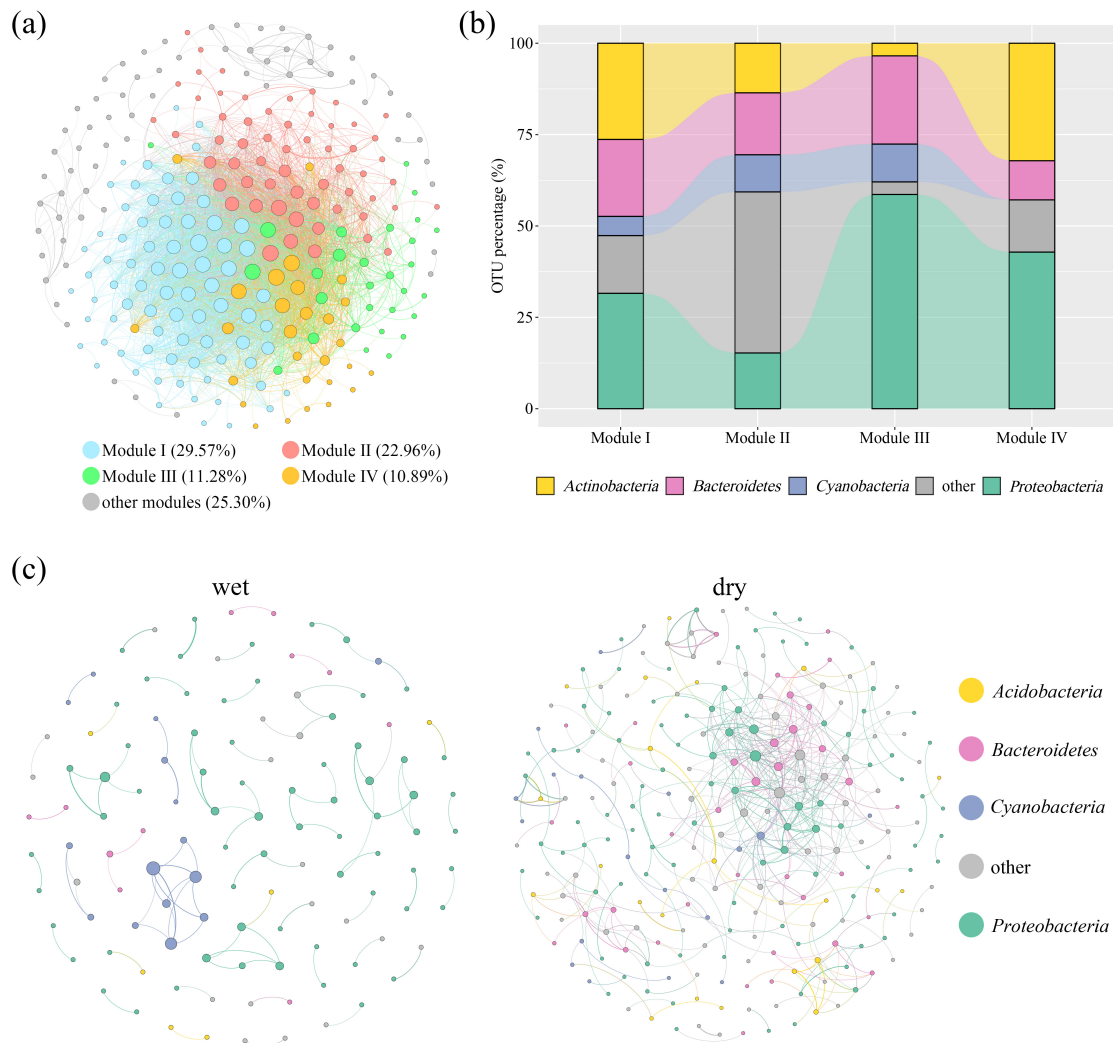

294  
295 Figure 4 Network analysis of bacterioplankton OTUs. (a) Overall co-occurrence  
296 network of OTUs. (b) The taxonomy composition of the four largest modules at the  
297 phylum level. (c) Co-occurrence network of OTUs in wet and dry seasons. A connection  
298 in (a) and (c) indicated a strong ( $|r|>0.65$ ) and significant ( $p<0.01$ , corrected by false  
299 discovery rate method) correlation. The size of each node was proportional to the  
300 number of connections.

### 301 3.4 Assembly process of bacterioplankton community

302 The neutral community model was applied to explore the assembly process of  
303 bacterioplankton community. Overall, the neutral community model fitted well for the  
304 whole bacterioplankton community, showing that stochastic process played an

305 unneglectable role in the assembly process of bacterioplankton community (Figure 5a).  
306 In addition, the neutral community model also fitted well for the rare bacterioplankton  
307 community while it could not fit the abundant bacterioplankton community ( $R^2 < 0$ )  
308 (Table S4), showing that stochastic process was the major process in shaping the rare  
309 bacterioplankton community rather than the abundant bacterioplankton community.

310 To further explore the relative contribution of stochastic and deterministic  
311 processes, the null model was applied based on the  $\beta$ NTI and RC (Figure 5b). The  
312 majority of  $\beta$ NTI values (72.1%) were less than -2 or higher than 2, showing that  
313 deterministic process played a more important role in the assembly process of  
314 bacterioplankton community than stochastic process. Among deterministic process,  
315 heterogeneous selection (53.6%), rather than homogeneous selection (16.8%), was the  
316 most crucial process for the assembly process of bacterioplankton community. In  
317 addition, contrasting assembly processes were observed for the abundant and rare  
318 bacterioplankton communities (Figure 5b). Stochastic process, mainly the dispersal  
319 limitation process, dominated the assembly process of the abundant bacterioplankton  
320 communities (Figure 5b), especially during wet season, as nearly all of the  $\beta$ NTI values  
321 (99.2%) were between -2 and 2, showing strong effects of stochastic process on the  
322 community assembly (Figure S4). On the contrary, deterministic process shaped the  
323 rare bacterioplankton community and it was attributed to heterogeneous selection  
324 (47.6%) and homogeneous selection (24.1%) (Figure 5b). Furthermore, higher values  
325 of habitat niche breadth were observed in the abundant bacterioplankton community  
326 compared with the rare bacterioplankton community (Figure S5), confirming that  
327 abundant bacterioplankton taxa were more likely to be limited for dispersal.

328 In this study, all of the environmental attributes exhibited significant temporal  
329 variation (Figure S6). Mantel test was further used to reveal which environmental  
330 variables were significantly correlated with the bacterioplankton community (Figure  
331 5c). The DO and pH exhibited the strongest relationships with the bacterioplankton  
332 community ( $r > 0.4$ ,  $p < 0.001$ ). For the whole and rare bacterioplankton communities, the  
333 DO, pH, TN,  $\text{NH}_4^+$ -N,  $\text{NO}_3^-$ -N, TP and TSS showed significant correlations with the  
334 bacterioplankton composition ( $r > 0.2$ ,  $p < 0.001$ ). For the abundant bacterioplankton

335 community, the DO, pH, TN, NO<sub>3</sub><sup>-</sup>-N, TP and TSS had strong and significant  
336 correlations with bacterioplankton community composition ( $r > 0.2$ ,  $p < 0.001$ ) while the  
337 NH<sub>4</sub><sup>+</sup>-N and PO<sub>4</sub><sup>3-</sup>-P showed relatively weaker relationships ( $r < 0.2$ ,  $p < 0.05$ ). These  
338 results indicated that bacterioplankton responded sensitively to environmental  
339 variations.

340 To further understand the response of bacterioplankton to environmental variations,  
341 the typical OTUs from the abundant and rare bacterioplankton communities were  
342 selected and their responses to environmental attributes were analyzed (Figure 6).  
343 Overall, the selected abundant taxa (62.8%) had a similar level of environmental  
344 associations as compared with the rare taxa (55.6%). In addition, 42.5% and 40% of the  
345 selected abundant and rare taxa had close and positive relations with DO and pH,  
346 respectively, implying the strong effects of DO and pH on bacterial taxa. The RDA plot  
347 revealed that the DO and pH had significant effects on the bacterioplankton community  
348 structures (whole, abundant, and rare communities) based on the 999 permutations of  
349 the Monte Carlo test (Figure S7,  $p < 0.001$ ). Furthermore, the variations of DO and pH  
350 had positively linear relationships with the  $\beta$ NTI values (Figure S8,  $p < 0.001$ ). These  
351 results together indicated that among the environmental attributes measured in this  
352 study, the DO and pH were the most important environmental attributes affecting the  
353 structure and assembly process of bacterioplankton community.

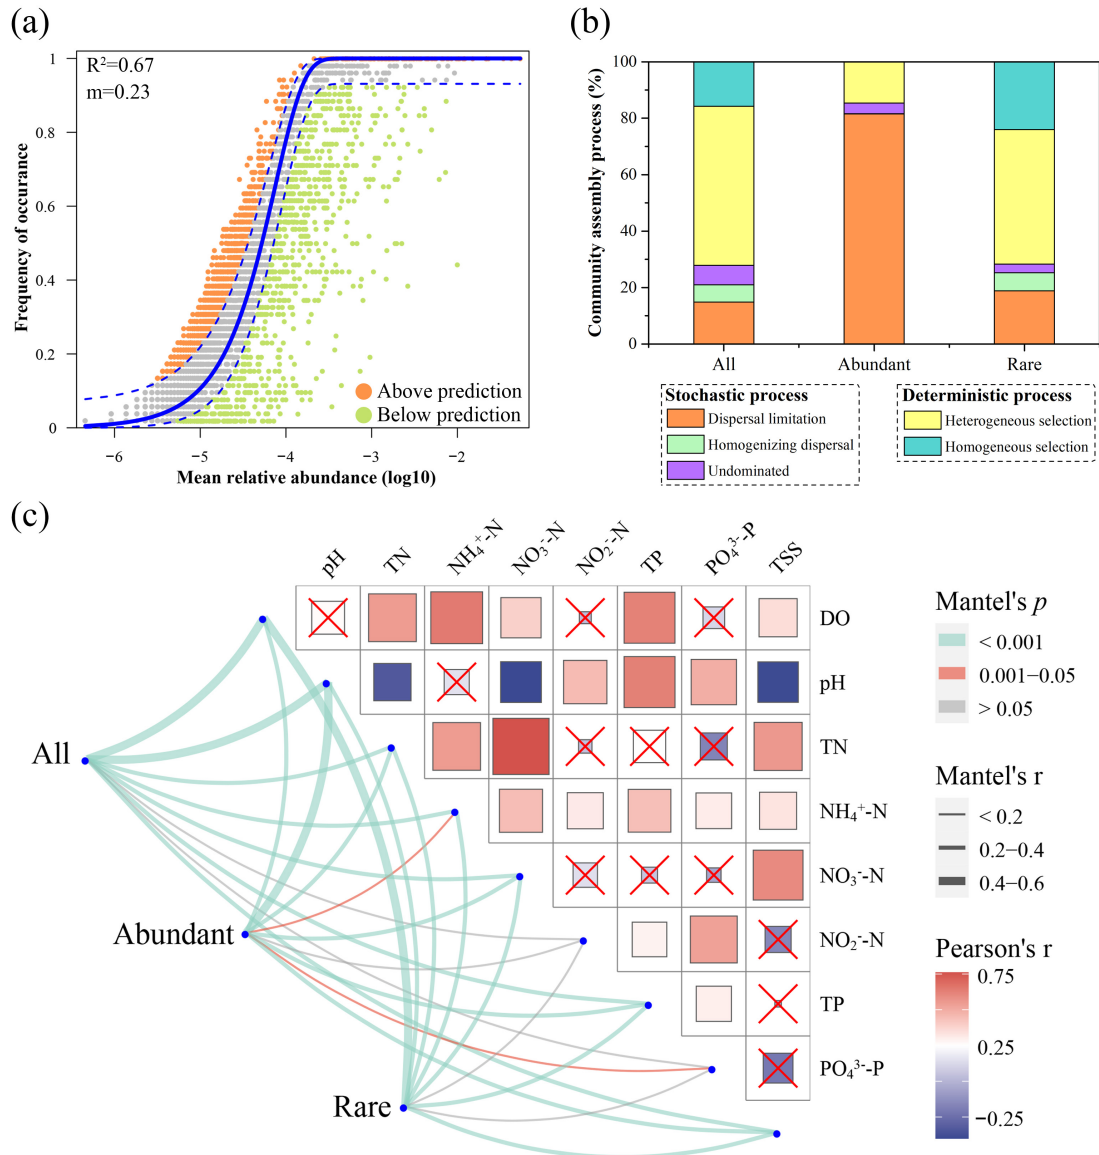

354

355 Figure 5 The assembly process and environmental drivers of the bacterioplankton  
 356 community. (a) Fit of the neutral community model. The orange and green circles  
 357 represented OTUs that occurred more and less frequently than predicted, respectively.  
 358 The solid blue line indicated the best fit to the neutral community model and the dashed  
 359 blue lines represented the 95% confidence intervals.  $m$  was the estimated migration rate  
 360 and  $R^2$  was the fit to the neutral community model. (b) Null model showing the  
 361 contributions of different ecological processes in assembling the bacterioplankton  
 362 community. (c) Environmental drivers of the bacterioplankton community by Mantel  
 363 test (bottom-left). Edge width corresponded to correlation coefficient and edge color  
 364 indicated statistical significance. Pairwise correlations of environmental attributes were



365 shown (upper-right) with color gradient representing correlation value and cross mark  
 366 indicating no significant ( $p>0.05$ ).

367

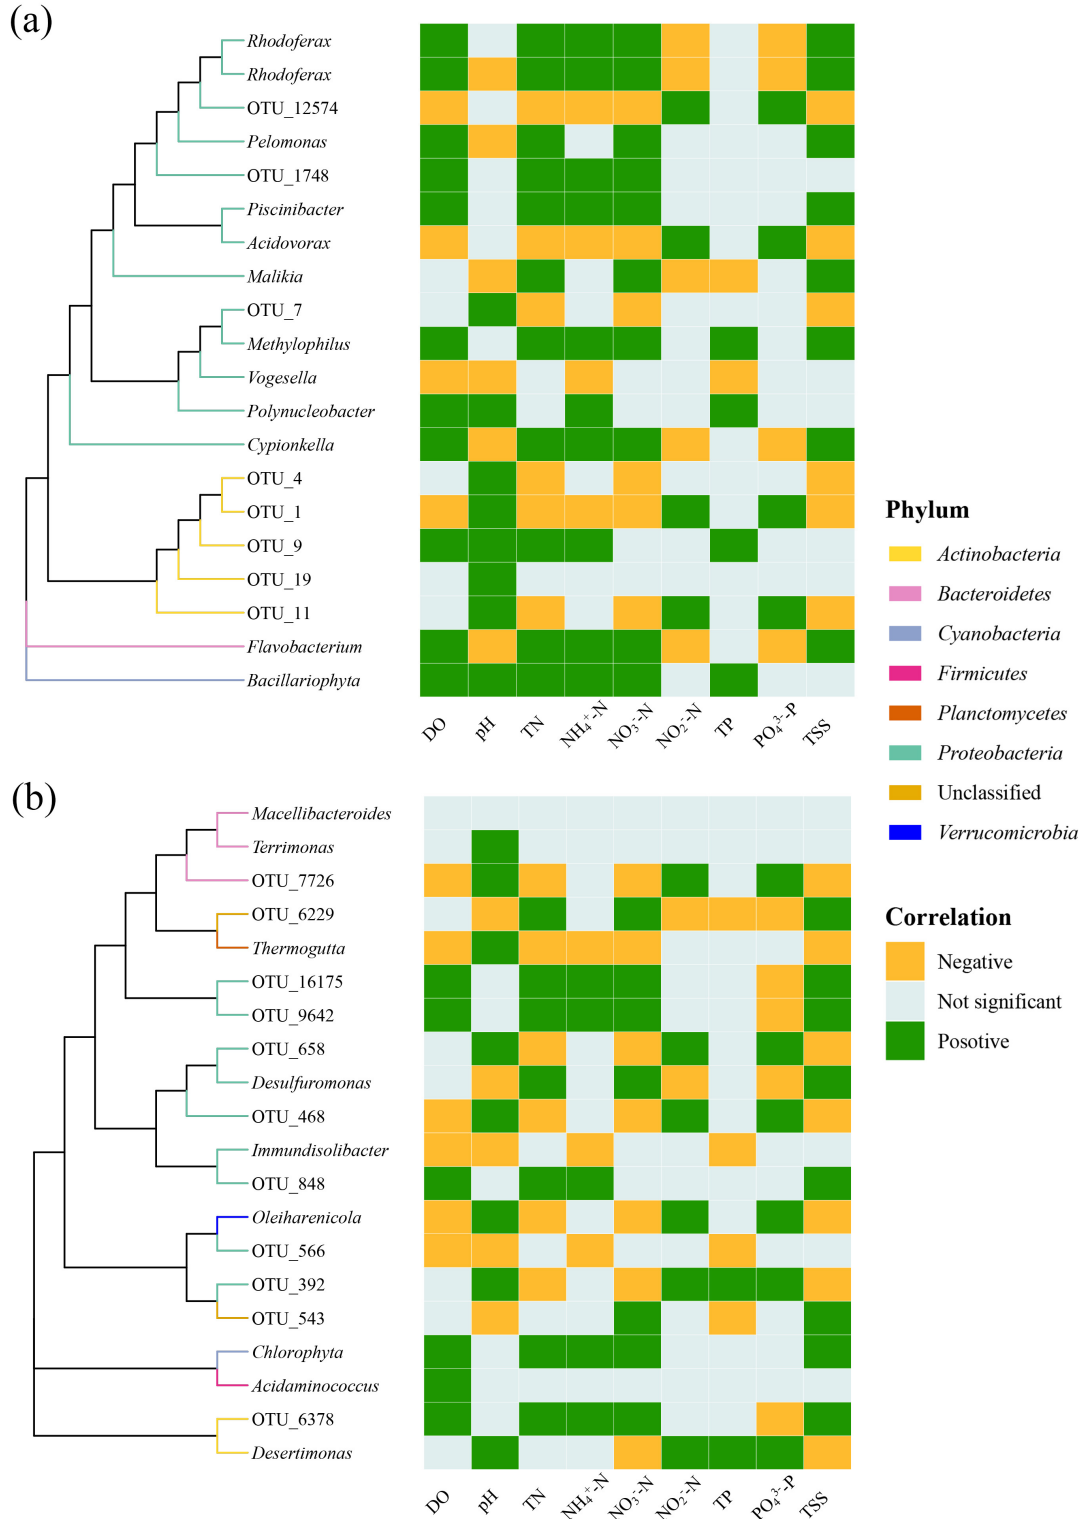

368

369 Figure 6 Phylogenetic analysis and environmental response of typical taxa in the (a)  
370 abundant and (b) rare bacterioplankton communities. OTUs that could be annotated at  
371 the genus level were shown as genus, otherwise as OTU ID.

## 372 **4. Discussion**

### 373 4.1 Spatiotemporal dynamics of bacterioplankton community

374 The dynamics of bacterioplankton community in aquatic environments has  
375 recently received a great deal of attentions in microbial ecology (Nemergut et al., 2013).  
376 This study contributed to our understanding of the spatiotemporal variations of  
377 bacterioplankton communities induced by different hydrologic conditions in river  
378 networks and provided some clues for the underlying mechanisms. In agreement with  
379 our expectations, the  $\alpha$ -diversity,  $\beta$ -diversity, and taxonomic composition of the  
380 bacterioplankton community all exhibited temporal variation (Figure 1a, Figure S3 and  
381 Figure 1c). Furthermore, the PCoA ordinations revealed the temporal variation of  
382 bacterioplankton community structure by showing that the bacterioplankton  
383 communities from the same season could be clustered together (Figure 3a) with higher  
384 community similarity during wet season than the other two seasons (Figure S3). Similar  
385 observations were reported for the bacterioplankton community in an estuarine  
386 ecosystem (Zhou et al., 2021) and microeukaryotic community in a subtropical river  
387 (Chen et al., 2019). Several reasons may explain this observation. Firstly, the different  
388 hydrologic conditions during wet, normal, and dry seasons led to different  
389 environmental conditions, which could further affect the structure and diversity of  
390 bacterioplankton community. In this study, close relationships among the  
391 environmental attributes were observed (Figure 5c) and all of the environmental  
392 attributes were found be statistically different during wet, normal, and dry seasons  
393 (Figure S6). Secondly, the four crisscrossing rivers in this study were interconnected  
394 and the bacterioplankton tended to be exchanged among them, leading to seasonal  
395 clusters in PCoA ordinations. Thirdly, rainfall primarily occurred during wet season in  
396 this region and the high river flow can promote the bacterial dispersal, resulting in  
397 higher community similarity during wet season than normal and dry seasons. A  
398 previous study revealed that the temporal succession of bacterioplankton community

399 may be an annually repeated process (Sommer et al., 2012) and whether it was applied  
400 to this region required long-term investigation in the future.

401 Meanwhile, spatial variation was also found to affect the bacterioplankton  
402 communities to some extent. A significant distance-decay pattern was observed for the  
403 bacterioplankton communities during wet and dry seasons and the distance-decay  
404 relationship was weaker during wet season than dry season (Figure 3). In a subtropical  
405 river, the distance-decay relationship of microeukaryotic community was also found to  
406 be weaker during dry season (Chen et al., 2019). In addition, the co-occurrence network  
407 showed that the bacterial interactions were looser in wet season than dry season (Figure  
408 4c and Table S3), which was similar to the observation in a estuarine ecosystem (Zhou  
409 et al., 2021). This was not surprising due to the dispersal ability of microorganisms were  
410 promoted by the rainfall and river flow during wet season, enhancing the community  
411 homogeneity of bacterioplankton, rather than establishing close community  
412 interactions.

#### 413 4.2 Geographic patterns of abundant and rare bacterioplankton communities

414 Several recent several studies have illustrated that rare microbial community may  
415 be of great importance to ecological functions in ecosystems (Chen et al., 2019; Chen  
416 et al., 2020; Jiao and Lu, 2020a; b; Lynch and Neufeld, 2015; Wan et al., 2021). In this  
417 study, the abundant and rare bacterioplankton communities were comparatively  
418 analyzed. Similar to the whole bacterioplankton community, the abundant and rare  
419 bacterioplankton communities exhibited temporal and spatial variations (Figure 2 and  
420 Figure 3a), indicating that they had similar geographic patterns. This observation was  
421 consistent with previous studies focusing on bacterioplankton communities in bays (Mo  
422 et al., 2018) and lakes (Liao et al., 2017) as well as microeukaryotic communities in a  
423 subtropical river (Chen et al., 2019). The similar geographic patterns suggested that the  
424 abundant and rare bacterioplankton communities might respond to the environmental  
425 changes in a similar way. This speculation was approved by the observation that the  
426 typical taxa of abundant and rare bacterioplankton communities showed similar  
427 relationships with environmental attributes (Figure 6). A previous study also suggested  
428 that abundant and rare taxa have comparable environmental sensitivity in aquatic

429 ecosystem (Logares et al., 2013). However, different patterns of abundant and rare  
430 bacterial communities were observed in an artificial bioreactor (Kim et al., 2013). These  
431 differences might due to the different ecosystems (natural and artificial), and in aquatic  
432 environments, rare microbial community might exhibit a similar geographic pattern to  
433 abundant microbial community.

#### 434 4.3 Assembly process of bacterioplankton community

435 The bacterioplankton community exhibited spatiotemporal dynamics, indicating  
436 that the assembly process might vary periodically. The neutral community model and  
437 null model were applied to further confirm this speculation. The neutral community  
438 model fitted well for the bacterioplankton community with a moderate fitted value  
439 ( $R^2=0.67$ , Figure 5a). The fitted value indicated that stochastic process played only a  
440 moderate role in the community assembly process by comparing with other studies  
441 (Chen et al., 2019; Zhang et al., 2021). Further, the null model confirmed this by  
442 showing that stochastic process was responsible for 27.9% of the community assembly  
443 and the remaining was deterministic process (Figure 5b). During wet season, stochastic  
444 process was the major process while deterministic process dominated during normal  
445 and dry seasons (Figure S4). These results were in agreement with the hydrologic  
446 conditions, in which the dispersal process occurred more easily in wet season together  
447 with rainfall and river flow, but it was relatively limited during the other two seasons.

448 In this study, the abundant and rare bacterioplankton communities were found to  
449 be assembled via distinct processes. Dispersal limitation mainly shaped the abundant  
450 bacterioplankton community while environmental selection (heterogeneous selection  
451 and homogeneous selection) dominated the assembly process of rare bacterioplankton  
452 community. This result was supported by previous studies in which the abundant taxa  
453 were mainly limited by dispersal in lakes and reservoirs (Liu et al., 2015), Pacific Ocean  
454 (Wu et al., 2017), mangrove (Zhang et al., 2021), and agricultural soils (Jiao and Lu,  
455 2020a; b). There were two possible reasons that may explain this observation. Firstly,  
456 the abundant bacterioplankton taxa were more likely to be involved in a dispersal event  
457 due to more individuals, resulting in widely distribution of abundant taxa (Jiao and Lu,  
458 2020b). The Venn diagram confirmed this by showing that most of the OTUs of

459 abundant bacterioplankton communities were commonly shared (Figure 3b). Secondly,  
460 the abundant bacterioplankton had wider niche breadth than the rare bacterioplankton  
461 (Figure S5). The taxa with wider niche breadth may be limited by the chances to reach  
462 multiple locations (Zhang et al., 2021). On the contrary, the taxa with narrower habit  
463 niche breadth would face stronger environmental selection (Wu et al., 2017), leading to  
464 deterministic process being the dominant assembly process for rare bacterioplankton  
465 community.

466 Among the environmental attributes measured in this study, DO and pH were  
467 found to be the most important factors affecting the bacterioplankton community  
468 structure and assembly process by Mantel test (Figure 5c), RDA (Figure S7), and  
469 correlation analysis (Figure S8). This result was reasonable for the following reasons.  
470 DO was well recognized as a critical factor for bacterial taxa due to its impact on  
471 bacterial activity and the specific selection of distinct bacterial lineages by DO  
472 concentration was well known (Wang et al., 2012). In addition, pH was believed to be  
473 an independent driver of bacterial diversity (Lauber et al., 2009) and any significant  
474 deviation in environmental pH can impose stress on these single cell microorganisms.  
475 It was found to play an important role in shaping the bacterial community structure  
476 (Chodak et al., 2013; Fierer and Jackson, 2006; Xu et al., 2017) and assembly process  
477 (Jiao and Lu, 2020a) in diverse ecosystems.

## 478 **5 Conclusion**

479 In this study, the dynamics of the bacterioplankton community during wet, normal  
480 and dry seasons in river networks of the Taihu Basin were analyzed by amplicon  
481 sequencing and multiple statistical analysis. The community structure, diversity and  
482 taxonomic composition of bacterioplankton exhibited temporal dynamics. The  
483 abundant and rare bacterioplankton were found to exhibit similar geographic pattern  
484 with spatiotemporal variations. Stochastic process shaped the abundant  
485 bacterioplankton community while deterministic process dominated the assembly  
486 process of rare bacterioplankton community. These results indicated that the abundant  
487 and rare bacterioplankton communities responded similarly to the variation of  
488 hydrologic conditions via distinct assembly processes.

489 **Acknowledgement**

490       The authors would like to thank Dr. James Walter Voordeckers for careful language  
491 edition. This study was supported by National Natural Science Foundation of China  
492 (No. 42007302), special fund for basic scientific research of Nanjing Institute of  
493 Environmental Sciences, MEE (No. GYZX210406), Natural Science Foundation of  
494 Jiangsu Province (No. BK20190481), China Postdoctoral Science Foundation (No.  
495 2020M681480), and special fund of State Key Joint Laboratory of Environment  
496 Simulation and Pollution Control (No. 20K06ESPCT).

497

498

499 **References:**

- 500 Baron, J.S., Poff, N.L., Angermeier, P.L., Dahm, C.N., Gleick, P.H., Hairston, N.G., et  
501 al., 2002. Meeting ecological and societal needs for freshwater. *Ecol. Appl.* 12 (5),  
502 1247-1260.
- 503 Bastian, M., Heymann, S., Jacomy, M., 2009. Gephi: An open source software for  
504 exploring and manipulating networks. *ICWSM* 8, 361-362.
- 505 Benjamini, Y., Hochberg, Y., 1995. Controlling the false discovery rate - A practical  
506 and powerful approach to multiple testing. *Journal of the Royal Statistical Society* 57  
507 (1), 289-300.
- 508 Caporaso, J.G., Lauber, C.L., Walters, W.A., Berg-Lyons, D., Lozupone, C.A.,  
509 Turnbaugh, P.J., et al., 2011. Global patterns of 16S rRNA diversity at a depth of  
510 millions of sequences per sample. *P. Natl. Acad. Sci. Usa.* 108, 4516-4522.
- 511 Chave, J., 2004. Neutral theory and community ecology. *Ecol. Lett.* 7 (3), 241-253.
- 512 Chen, L., Tsui, M.M.P., Lam, J.C.W., Hu, C., Wang, Q., Zhou, B., et al., 2019.  
513 Variation in microbial community structure in surface seawater from Pearl River Delta:  
514 Discerning the influencing factors. *Sci. Total Environ.* 660, 136-144.
- 515 Chen, Q., Ding, J., Zhu, D., Hu, H., Delgado-Baquerizo, M., Ma, Y., et al., 2020. Rare  
516 microbial taxa as the major drivers of ecosystem multifunctionality in long-term  
517 fertilized soils. *Soil Biol. Biochem.* 141.
- 518 Chen, W., Ren, K., Isabwe, A., Chen, H., Liu, M., Yang, J., 2019. Stochastic processes  
519 shape microeukaryotic community assembly in a subtropical river across wet and dry  
520 seasons. *Microbiome* 7 (1).
- 521 Chodak, M., Gołębiewski, M., Morawska-Płoskonka, J., Kuduk, K., Niklińska, M.,  
522 2013. Diversity of microorganisms from forest soils differently polluted with heavy  
523 metals. *Appl. Soil Ecol.* 64, 7-14.
- 524 Dudgeon, D., Arthington, A.H., Gessner, M.O., Kawabata, Z., Knowler, D.J., Leveque,  
525 C., et al., 2006. Freshwater biodiversity: importance, threats, status and conservation  
526 challenges. *Biol. Rev.* 81 (2), 163-182.
- 527 Edgar, R.C., 2010. Search and clustering orders of magnitude faster than BLAST.

528 Bioinformatics 26 (19), 2460-2461.

529 Edgar, R.C., 2013. UPARSE: highly accurate OTU sequences from microbial amplicon  
530 reads. *Nat. Methods* 10 (10), 996.

531 Fierer, N., Jackson, R.B., 2006. The diversity and biogeography of soil bacterial  
532 communities. *Proceedings of the National Academy of Sciences* 103 (3), 626-631.

533 Hubbell, S.P., 2005. Neutral theory in community ecology and the hypothesis of  
534 functional equivalence. *Funct. Ecol.* 19 (1), 166-172.

535 Isabwe, A., Yang, J.R., Wang, Y., Liu, L., Chen, H., Yang, J., 2018. Community  
536 assembly processes underlying phytoplankton and bacterioplankton across a hydrologic  
537 change in a human-impacted river. *Sci. Total Environ.* 630, 658-667.

538 Jia, X., Dini-Andreote, F., Salles, J.F., 2018. Community Assembly Processes of the  
539 Microbial Rare Biosphere. *Trends Microbiol.* 26 (9), 738-747.

540 Jiao, S., Lu, Y., 2020a. Soil pH and temperature regulate assembly processes of  
541 abundant and rare bacterial communities in agricultural ecosystems. *Environ.*  
542 *Microbiol.* 22 (3), 1052-1065.

543 Jiao, S., Lu, Y., 2020b. Abundant fungi adapt to broader environmental gradients than  
544 rare fungi in agricultural fields. *Global Change Biol.* 26 (8), 4506-4520.

545 Kim, T., Jeong, J., Wells, G.F., Park, H., 2013. General and rare bacterial taxa  
546 demonstrating different temporal dynamic patterns in an activated sludge bioreactor.  
547 *Appl. Microbiol. Biot.* 97 (4), 1755-1765.

548 Kim, T.S., Jeong, J.Y., Wells, G.F., Park, H.D., 2013. General and rare bacterial taxa  
549 demonstrating different temporal dynamic patterns in an activated sludge bioreactor.  
550 *Appl Microbiol Biotechnol* 97 (4), 1755-1765.

551 Kumar, S., Stecher, G., Tamura, K., 2016. MEGA7: molecular evolutionary genetics  
552 analysis version 7.0 for bigger datasets. *Mol. Biol. Evol.* 33 (7), 1870-1874.

553 Lauber, C.L., Hamady, M., Knight, R., Fierer, N., 2009. Pyrosequencing-Based  
554 Assessment of Soil pH as a Predictor of Soil Bacterial Community Structure at the  
555 Continental Scale. *Appl. Environ. Microb.* 75 (15), 5111-5120.

556 Liao, Jingqiu, Cao, Xiaofeng, Wang, Jie, et al., 2017. Similar community assembly  
557 mechanisms underlie similar biogeography of rare and abundant bacteria in lakes on



558 Yungui Plateau, China. *Limnology & Oceanography*.

559 Lima-Mendez, G., Faust, K., Henry, N., Decelle, J., Colin, S., Carcillo, F., et al., 2015.

560 Determinants of community structure in the global plankton interactome. *Science* 348

561 (6237).

562 Liu, L., Yang, J., Yu, Z., Wilkinson, D.M., 2015. The biogeography of abundant and

563 rare bacterioplankton in the lakes and reservoirs of China. *The ISME Journal* 9 (9),

564 2068-2077.

565 Logares, R., Lindstrom, E.S., Langenheder, S., Logue, J.B., Paterson, H., Laybourn-

566 Parry, J., et al., 2013. Biogeography of bacterial communities exposed to progressive

567 long-term environmental change. *Isme J.* 7 (5), 937-948.

568 Lu, Z., Liu, Z., Zhang, C., Wei, Q., Zhang, S., Li, M., 2021. Spatial and seasonal

569 variations of sediment bacterial communities in a river-bay system in South China.

570 *Appl. Microbiol. Biot.* 105 (5), 1979-1989.

571 Lynch, M.D.J., Neufeld, J.D., 2015. Ecology and exploration of the rare biosphere. *Nat.*

572 *Rev. Microbiol.* 13 (4), 217-229.

573 Madsen, E.L., 2011. Microorganisms and their roles in fundamental biogeochemical

574 cycles. *Curr. Opin. Biotech.* 22 (3), 456-464.

575 Mo, Y., Zhang, W., Yang, J., Lin, Y., Yu, Z., Lin, S., 2018. Biogeographic patterns of

576 abundant and rare bacterioplankton in three subtropical bays resulting from selective

577 and neutral processes. *The ISME Journal* 12 (9), 2198-2210.

578 Nemergut, D.R., Schmidt, S.K., Fukami, T., O'Neill, S.P., Bilinski, T.M., Stanish, L.F.,

579 et al., 2013. Patterns and Processes of Microbial Community Assembly. *Microbiol. Mol.*

580 *Biol. R.* 77 (3), 342-356.

581 Segata, N., Izard, J., Waldron, L., Gevers, D., Miropolsky, L., Garrett, W.S., et al., 2011.

582 Metagenomic biomarker discovery and explanation. *Genome Biology* 12 (6), R60.

583 Sloan, W.T., Lunn, M., Woodcock, S., Head, I.M., Nee, S., Curtis, T.P., 2006.

584 Quantifying the roles of immigration and chance in shaping prokaryote community

585 structure. *Environ. Microbiol.* 8 (4), 732-740.

586 Sommer, U., Adrian, R., De, L., Domis, S., Winder, M., 2012. Beyond the Plankton

587 Ecology Group (PEG) Model: Mechanisms Driving Plankton Succession. *Annual*

588 Review of Ecology Evolution & Systematics 43 (1), 429-448.

589 Staley, C., Unno, T., Gould, T.J., Jarvis, B., Phillips, J., Cotner, J.B., et al., 2013.

590 Application of Illumina next-generation sequencing to characterize the bacterial

591 community of the Upper Mississippi River. *J. Appl. Microbiol.* 115 (5), 1147-1158.

592 Stegen, J.C., Lin, X., Fredrickson, J.K., Chen, X., Kennedy, D.W., Murray, C.J., et al.,

593 2013. Quantifying community assembly processes and identifying features that impose

594 them. *Isme J.* 7 (11), 2069-2079.

595 Vanwonterghem, I., Jensen, P.D., Dennis, P.G., Hugenholtz, P., Rabaey, K., Tyson,

596 G.W., 2014. Deterministic processes guide long-term synchronised population

597 dynamics in replicate anaerobic digesters. *Isme J.* 8 (10), 2015-2028.

598 Wan, W., Grossart, H., He, D., Yuan, W., Yang, Y., 2021. Stronger environmental

599 adaptation of rare rather than abundant bacterioplankton in response to dredging in

600 eutrophic Lake Nanhu (Wuhan, China). *Water Res.* 190, 116751.

601 Wang, Q., Garrity, G.M., Tiedje, J.M., Cole, J.R., 2007. Naive Bayesian classifier for

602 rapid assignment of rRNA sequences into the new bacterial taxonomy. *Appl. Environ.*

603 *Microb.* 73 (16), 5261-5267.

604 Wang, X., Hu, M., Xia, Y., Wen, X., Ding, K., 2012. Pyrosequencing analysis of

605 bacterial diversity in 14 wastewater treatment systems in China. *Appl. Environ. Microb.*

606 78 (19), 7042-7047.

607 Wu, W., Logares, R., Huang, B., Hsieh, C., 2017. Abundant and rare picoeukaryotic

608 sub-communities present contrasting patterns in the epipelagic waters of marginal seas

609 in the northwestern Pacific Ocean. *Environ. Microbiol.* 19 (1), 287-300.

610 Wu, W., Lu, H., Sastri, A., Yeh, Y., Gong, G., Chou, W., et al., 2018. Contrasting the

611 relative importance of species sorting and dispersal limitation in shaping marine

612 bacterial versus protist communities. *Isme J.* 12 (2), 485-494.

613 Xu, S., Lu, W., Liu, Y., Ming, Z., Liu, Y., Meng, R., et al., 2017. Structure and diversity

614 of bacterial communities in two large sanitary landfills in China as revealed by high-

615 throughput sequencing (MiSeq). *Waste Manage.* 63, 41-48.

616 Yu, G., Smith, D.K., Zhu, H., Guan, Y., Lam, T.T., 2017. GGTree: an R package for

617 visualization and annotation of phylogenetic trees with their covariates and other

618 associated data. *Methods Ecol. Evol.* 8 (1), 28-36.

619 Zhang, L., Delgado-Baquerizo, M., Shi, Y., Liu, X., Yang, Y., Chu, H., 2021. Co-  
620 existing water and sediment bacteria are driven by contrasting environmental factors  
621 across glacier-fed aquatic systems. *Water Res.* 198, 117139.

622 Zhang, Z., Pan, J., Pan, Y., Li, M., Gilbert, J.A., 2021. Biogeography, Assembly  
623 Patterns, Driving Factors, and Interactions of Archaeal Community in Mangrove  
624 Sediments. *mSystems*, e138120.

625 Zhao, D., Cao, X., Huang, R., Zeng, J., Shen, F., Xu, H., et al., 2017. The heterogeneity  
626 of composition and assembly processes of the microbial community between different  
627 nutrient loading lake zones in Taihu Lake. *Appl. Microbiol. Biot.* 101 (14), 5913-5923.

628 Zhou, J., Ning, D., 2017. Stochastic Community Assembly: Does It Matter in Microbial  
629 Ecology? *Microbiol Mol Biol Rev* 81 (4).

630 Zhou, L., Wang, P., Huang, S., Li, Z., Gong, H., Huang, W., et al., 2021. Environmental  
631 filtering dominates bacterioplankton community assembly in a highly urbanized  
632 estuarine ecosystem. *Environ. Res.* 196, 110934.

633
